# Supplementary material for: Transition-metal monochalcogenide nanowires: highly efficient bi-functional catalysts for the oxygen evolution/reduction reactions
Source: Royal Society of Chemistry journal article supplement (doi:10.1039/d0nr01148g), 2020-01-01
Supplement: d0nr01148g1.pdf [file d0nr01148g1.pdf]

*Supporting Information*

Transition-metal monochalcogenide nanowires: High-efficient  
bi-functional catalysts for oxygen evolution/reduction reactions

Wenqing Zhang, Juan Wang, Lanling Zhao\*, Junru Wang, Mingwen Zhao\*

*School of Physics and State Key Laboratory of Crystal Materials, Shandong  
University, Jinan, Shandong, 250100, China*

\*Corresponding authors: [lanling@sdu.edu.cn](mailto:lanling@sdu.edu.cn) (L. Zhao); [zmw@sdu.edu.cn](mailto:zmw@sdu.edu.cn) (M. Zhao)

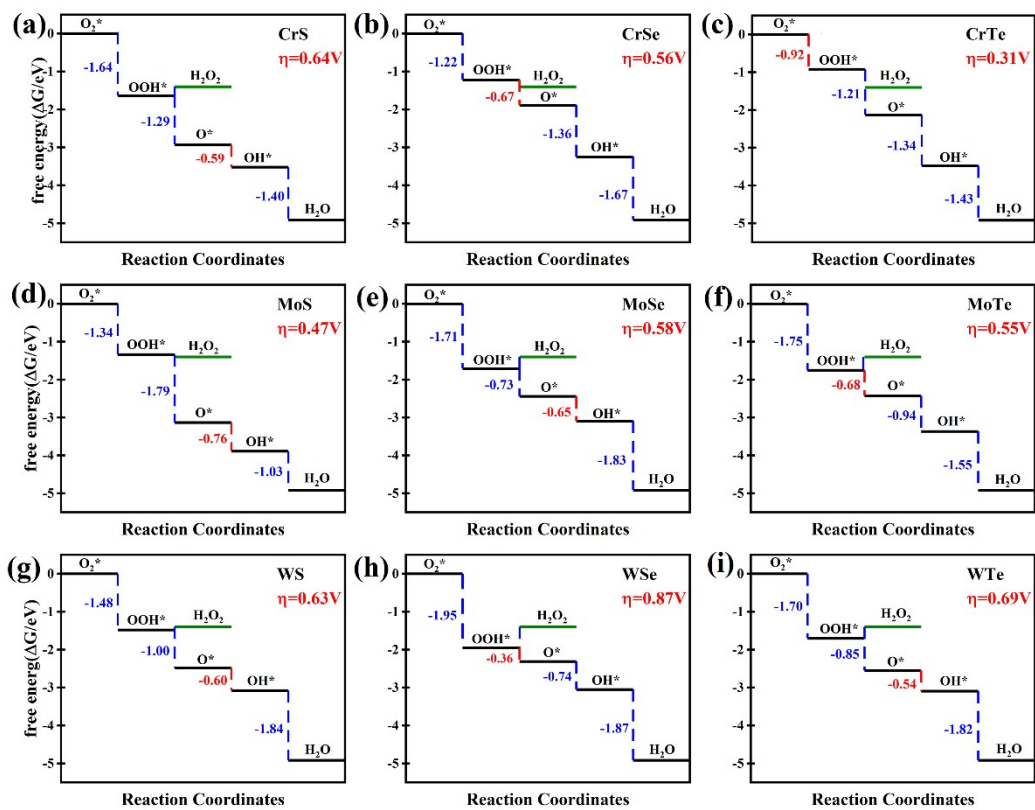

Fig. S1. Free energy figures of (a) CrS, (b) CrSe, (c) CrTe, (d) MoS, (e) MoSe, (f) MoTe, (g) WS, (h) WSe, and (i) WTe for ORR process at zero potential ( $U = 0$ ), where the elementary reaction with  $\Delta G$  in red represents the potential-determining step.

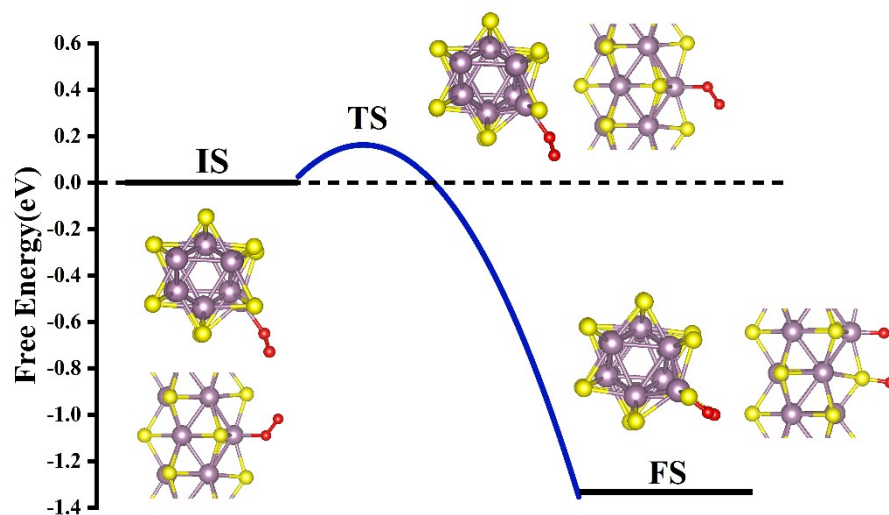

Fig. S2. Energy profile for the  $O_2$  dissociation on MoS nanowires.

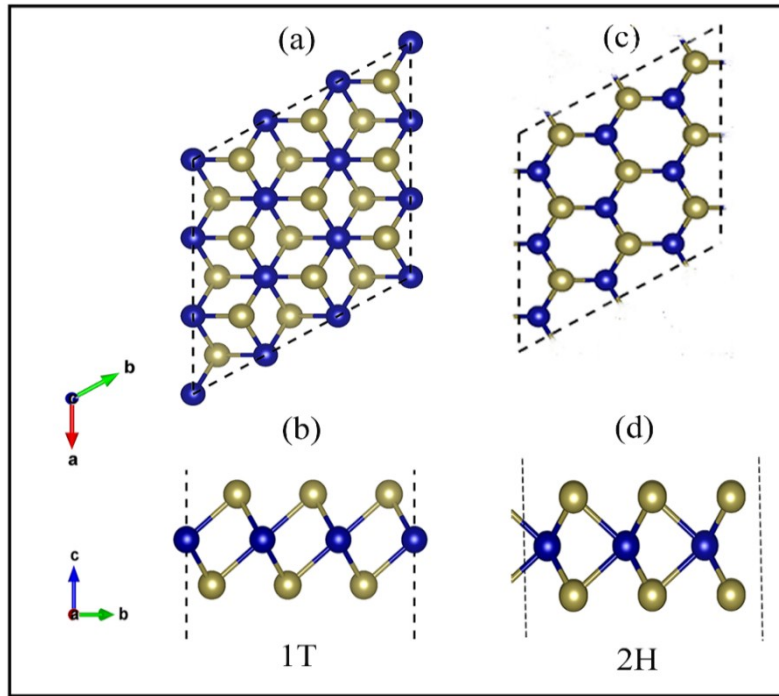

Fig. S3. The representative structures of 2D CrTe<sub>2</sub> monolayers in 3×3×1 supercells: (a) top and (b) side views of 1T phase, (c) top and (d) side view of 2H phase. The blue and yellow atom represent metal and chalcogen atoms, respectively.

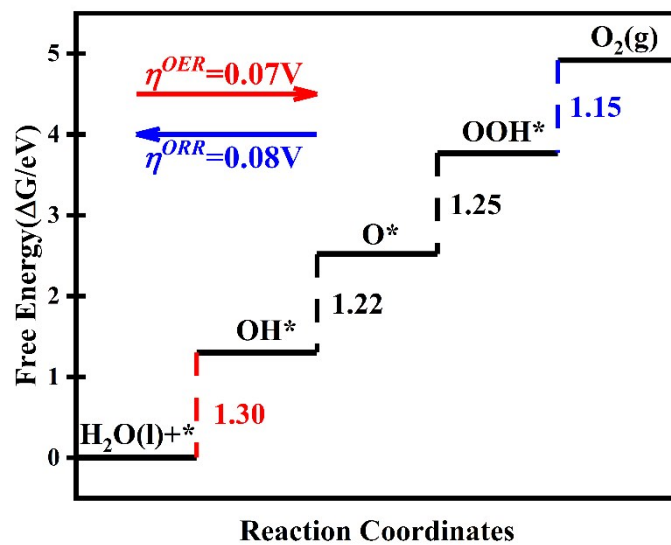

Fig. S4 Free energy diagram of CrTe NW obtained by involving solvent effect. The solvent effect was taken into account by using an implicit solvation model with the dielectric constant of 78.54 (water).

Table S1 The OER/ORR overpotentials of CrTe NWs under tensile strain ( $\varepsilon$ ).

| $\varepsilon$    | 0%   | 1%   | 3%   | 5%   |
|------------------|------|------|------|------|
| $\eta^{OER}$ (V) | 0.20 | 0.18 | 0.28 | 0.24 |
| $\eta^{ORR}$ (V) | 0.31 | 0.28 | 0.37 | 0.38 |

Table S2. Optimized lattice constant, band gap ( $E_g$ ), active site, overpotential and electron transfer from metal to chalcogen atom ( $\Delta Q$ ) of monolayer  $\text{MX}_2$ .

|                   | structure | lattice constant(Å) | band gap(eV) | active site | $\eta^{\text{OER}}(\text{V})$ | $\eta^{\text{ORR}}(\text{V})$ | electron transfer(e) |
|-------------------|-----------|---------------------|--------------|-------------|-------------------------------|-------------------------------|----------------------|
| CrS <sub>2</sub>  | 1T        | 3.06                | Metal        | S           | 1.96                          | 1.32                          | 0.51                 |
|                   | 2H        | 3.04                | 0.94         | S           | 0.96                          | 1.82                          | 0.50                 |
| CrSe <sub>2</sub> | 1T        | 3.20                | Metal        | Se          | 1.09                          | 0.80                          | 0.43                 |
|                   | 2H        | 3.20                | 0.76         | Se          | 1.26                          | 1.25                          | 0.42                 |
| CrTe <sub>2</sub> | 1T        | 3.47                | Metal        | Te          | 2.35                          | 1.29                          | 0.31                 |
|                   | 2H        | 3.56                | 0.59         | Te          | 0.53                          | 0.68                          | 0.30                 |
| MoS <sub>2</sub>  | 1T        | 3.20                | Metal        | S           | 2.38                          | 1.50                          | 0.56                 |
|                   | 2H        | 3.18                | 1.62         | S           | 1.54                          | 2.14                          | 0.53                 |
| MoSe <sub>2</sub> | 1T        | 3.29                | Metal        | Se          | 1.04                          | 0.88                          | 0.42                 |
|                   | 2H        | 3.32                | 1.44         | Se          | 1.45                          | 1.56                          | 0.42                 |
| MoTe <sub>2</sub> | 1T        | 3.47                | Metal        | Te          | 2.11                          | 1.31                          | 0.25                 |
|                   | 2H        | 3.52                | 1.14         | Te          | 0.99                          | 0.99                          | 0.25                 |
| WS <sub>2</sub>   | 1T        | 3.21                | Metal        | S           | 2.48                          | 1.98                          | 0.65                 |
|                   | 2H        | 3.18                | 1.8          | S           | 1.65                          | 2.16                          | 0.60                 |
| WSe <sub>2</sub>  | 1T        | 3.33                | Metal        | Se          | 1.25                          | 2.08                          | 0.48                 |
|                   | 2H        | 3.33                | 1.48         | Se          | 1.51                          | 1.82                          | 0.47                 |
| WTe <sub>2</sub>  | 1T        | 3.53                | Metal        | Te          | 2.39                          | 1.88                          | 0.27                 |
|                   | 2H        | 3.87                | 0.99         | Te          | 1.03                          | 1.29                          | 0.27                 |

## ORR Mechanism

The dissociative mechanism pathways are generally the following equations (S1-S5):

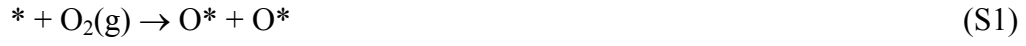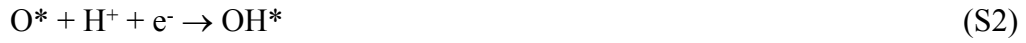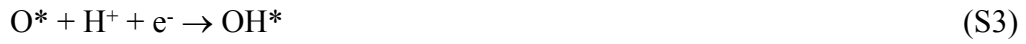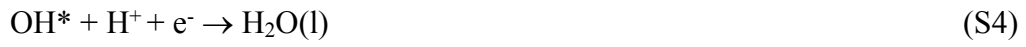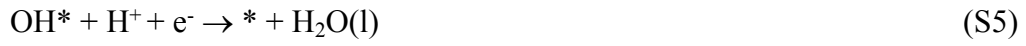

In associative mechanism, ORR follows the following steps:

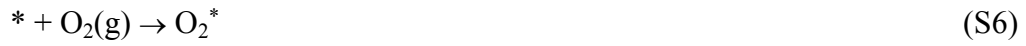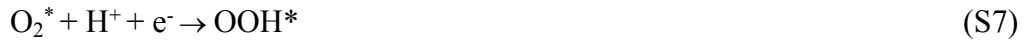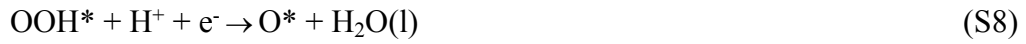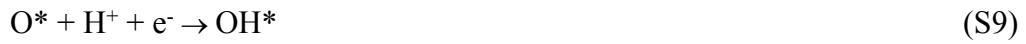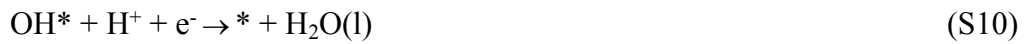

The formation energies are calculated with following equations:

$$\Delta E_{\text{OH}^*} = E_{\text{NW-OH}} - E_{\text{NW}} - (E_{\text{H}_2\text{O}} - 0.5E_{\text{H}_2}) \quad (\text{S11})$$

$$\Delta E_{\text{O}^*} = E_{\text{NW-O}} - E_{\text{NW}} - (E_{\text{H}_2\text{O}} - E_{\text{H}_2}) \quad (\text{S12})$$

$$\Delta E_{\text{OOH}^*} = E_{\text{NW-OOH}} - E_{\text{NW}} - (2E_{\text{H}_2\text{O}} - 1.5E_{\text{H}_2}) \quad (\text{S13})$$

where  $E_{\text{NW}}$  is the ground state energy of the nanowires before adsorption,  $E_{\text{NW-OH}}$ ,



$E_{\text{NW-O}}$ ,  $E_{\text{NW-OOH}}$  are the ground state energies of nanowires absorbed with  $\text{O}^*$ ,  $\text{OH}^*$ , and  $\text{OOH}^*$ , respectively.  $E_{\text{H}_2\text{O}}$  and  $E_{\text{H}_2}$  are the energies of single isolated  $\text{H}_2\text{O}$  and  $\text{H}_2$  molecules in the liquid and gas phase, respectively.
